# Supplementary material for: Pumas, culpeo foxes, bad and good dogs. Assessing strategies to mitigate predation
Source: Research Square preprint supplement (doi:10.21203/rs.3.rs-7234506/v1), 2025-09-03
Supplement: Supplementary file 1 [file 04733d1bfdc512ba5e7d09f5.docx]

**Supporting Information-A1**

*General data processing*

All geospatial analyses were executed using QGIS version 3.36.0 (QGIS Development Team, 2024). We calculated the distance between carcasses and the nearest town or village perimeter. MODIS imagery was used to estimate the mean NDVI for the 2016-2017 season per ranch. We assessed the biophysical characteristics of carcass locations in terms of their suitability as puma and culpeo fox kill sites by analyzing land irregularity through digital elevation models of the study area. Species-specific buffers were applied around each carcass to estimate the Terrain Ruggedness Index (TRI; Riley et al., 1999). For pumas, we used a buffer of 4,461 m in diameter, as proposed by Zeller et al. (2017) for open grasslands. For culpeo foxes, we used available data on home range size (Novaro, 1997) and applied a buffer with a 3,337 m diameter.

*Field methods to estimate covariables*

*Native carnivores (puma_rai and culpeo_rai) and European hare (lepus_rai) relative abundance.* Regarding *puma_rai* and *culpeo_rai*, these variables were employed as proxies to assess the influence of carnivore abundance and habitat use patterns on sheep predation across the study area. Similarly, *lepus_rai* was used to analyze the relationship between prey availability and sheep mortality occurrence (Khorozyan *et al.*, 2015; Janeiro-Otero *et al.*, 2020). In all these cases, we estimated the Relative Abundance Index (RAI; O’Connell et al., 2011) for pumas, culpeo foxes, and their wild prey at the nearest camera trap station to the carcass. From November 2017 to May 2018, we installed 44 camera trap stations baited with Iberian lynx (*Lynx pardinus*) urine. The spatial-temporal survey design aimed to maximize study area coverage while considering differences in space-use patterns between pumas and culpeo foxes. The design consisted of subsets composed of three stations equally spaced (3.0 ± 1.2 km apart) and with an inter-subset distance of 7.6 ± 2.2 km (Figure 1). Monitoring occurred in two sampling periods of 81 days each. The first period (11/26/2017–02/14/2018) covered ranches A, B, and D, while the second period (03/01/2018–05/20/2018) sampled ranches C, E, and F. Photograph metadata was processed using the camtrapR package (version 2.0.2; Niedballa et al., 2016) in R (version 3.6.3; R Core Team, 2020). RAI was estimated as: (number of independent captures of species X/effective sampling effort at station J) * 100. To prevent pseudoreplication, we considered independent captures as those separated by more than 24 hours. Additionally, for pumas and culpeo foxes, we excluded images featuring only juveniles or subadults.

*Wild herbivores available biomass.* We applied specific estimation methodologies for abundance and available biomass of different functional prey groups. Micromammal availability was estimated using Capture-Recapture Models. Two 6 × 6 Sherman trap grids per ranch were established and activated seasonally (summer-winter) during the 2016-2017 period. In total, 6,840 trap-nights were conducted, and capture histories were processed using the RMark package (version 2.2.7; Laake et al., 2019) in R (version 3.6.3; R Core Team, 2020), applying standard procedures (Conroy and Carroll, 2009; Thomas *et al.*, 2010; Miller *et al.*, 2016) to estimate micromammal density. These values were then multiplied by the mean body mass of all captured individuals. We averaged micromammal biomass across the 2017 summer-winter period. Remaining prey item densities were estimated using standard Distance Sampling procedures (Buckland *et al.*, 2015) through vehicular transects established on internal ranch roads. These transects were conducted seasonally from autumn 2017 to summer 2018. We sampled European hare, and large ungulates (guanaco and red deer, *Cervus elaphus*) and medium-to-large terrestrial birds (*Chloephaga picta* and *Rhea pennata*). Both groups were surveyed using the same transects, but European hare counts were conducted at night Annual densities per ranch were estimated using the Distance package (version 1.0.0; Miller et al., 2016) in R (version 3.6.3; R Core Team, 2020) and multiplied by species-specific mean body mass to calculate available prey biomass. Finally, we estimated *wh_biomass* by summing the annual biomass of all prey items per ranch.

*Ranch predation management.* Regarding predation management, data were obtained through a brief questionnaire administered to ranch managers. All interviewees were informed about the survey objectives, and the questionnaire was conducted only after they provided consent, in accordance with the Ethics Code for Ethnobiological Investigation in Latin America (SOLAE, 2016). The questionnaire gathered information on sheep stock, the number of pumas and culpeo foxes killed annually, and the number of LGDs working on each ranch.

**References**

Buckland, S.T. *et al.* (2015) *Distance Sampling : Methods and Applications*. New York, US: Springer. Available at: https://doi.org/10.1007/978-3-319-19219-2.

Conroy, M.J. and Carroll, J.P. (2009) *Quantitative Conservation of Vertebrates*, *Quantitative Conservation of Vertebrates*. Available at: https://doi.org/10.1002/9781444303155.

Janeiro-Otero, A. *et al.* (2020) ‘Grey wolf (Canis lupus) predation on livestock in relation to prey availability’, *Biological Conservation*. Elsevier Ltd. Available at: https://doi.org/10.1016/j.biocon.2020.108433.

Khorozyan, I. *et al.* (2015) ‘Big cats kill more livestock when wild prey reaches a minimum threshold’, *Biological Conservation*, 192, pp. 268–275. Available at: https://doi.org/10.1016/j.biocon.2015.09.031.

Laake, J. *et al.* (2019) ‘Package “ RMark ”’.

Miller, D.L. *et al.* (2016) ‘Distance Sampling in R’, *bioRxiv*, p. 063891. Available at: https://doi.org/10.1101/063891.

Niedballa, J. *et al.* (2016) ‘camtrapR: an R package for efficient camera trap data management’, *Methods in Ecology and Evolution*, 7(12), pp. 1457–1462. Available at: https://doi.org/10.1111/2041-210X.12600.

Novaro, A.J. (1997) ‘Pseudalopex culpaeus’, *Mammalian Species*, 558, pp. 1–8.

R Core Team (2020) ‘R: A language and environment for statistical computing’. Vienna, Austria: R Foundation for Statistical Computing. Available at: https://www.r-project.org/.

Riley, S.J., DeGloria, S.D. and Elliot, Robert. (1999) ‘A terrain ruggedness index that quantifies topographic heterogeneity’, *Intermountain Journal of Sciences*, 5(1–4), pp. 23–27.

SOLAE (2016) ‘Código de Ética para la investigación, la investigación-acción y la colaboración etnocientífica en América Latina’, *Etnobiología*, 1, pp. 1–34. Available at: www.asociacionetnobiologica.org.mx,.

Thomas, L. *et al.* (2010) ‘Distance software: Design and analysis of distance sampling surveys for estimating population size’, *Journal of Applied Ecology*, 47(1), pp. 5–14. Available at: https://doi.org/10.1111/j.1365-2664.2009.01737.x.
