# Supplementary material for: Pumas, culpeo foxes, bad and good dogs. Assessing strategies to mitigate predation
Source: Research Square preprint supplement (doi:10.21203/rs.3.rs-7234506/v1), 2025-09-03
Supplement: Supplementary file 2 [file 23d7c961d0d03e249b540e91.xlsx]

## Sheet: Hoja1
id	date	hour	ranch	weight	sex	etarian_cat	diagnose	predation_type	predator
56840	2015-11-10		B	4.58	female	perinatal	SHC
56892	2015-11-10	10:40:00	B	3.09	female	perinatal	SHC
56824	2015-11-11	07:53:00	B	3.96	male	perinatal	SHC
56762	2015-11-11	08:25:00	B	3.72	male	perinatal	SHC
56815	2015-11-11	09:09:00	B	2.51	NA	perinatal	undetermined
56899	2015-11-12	08:11:00	B	2.32	male	perinatal	undetermined
56874	2015-11-13	07:23:00	B	12.87	male	lamb	predation	primary	culpeo
56897	2015-11-27	08:38:00	B	3.16	female	perinatal	SHC
56814	2015-11-27	09:38:00	B	3.52	female	perinatal	SHC
56933	2015-11-28	07:19:00	B	4.21	female	lamb	predation	undetermined	culpeo
56050	2015-11-29	07:18:00	B	7.37	male	lamb	predation	undetermined	culpeo
56882	2016-01-12	08:45:00	B	5.17	NA	lamb	predation	undetermined	culpeo
56861	2016-01-13	06:40:00	B	20.12	female	lamb	predation
56879	2016-01-13	09:26:00	B	11.63	male	lamb	predation	undetermined	culpeo
56871	2016-01-14	08:10:00	B	11.43	female	lamb	predation	primary	culpeo
56843	2016-01-14	08:26:00	B	11.16	male	lamb	predation	primary	culpeo
56845	2016-01-14	08:31:00	B	16.5	male	lamb	predation	primary	culpeo
56888	2016-01-14	09:17:00	B	8.51	male	lamb	predation	undetermined	culpeo
56837	2016-01-15	07:38:00	B	12.13	female	lamb	predation	undetermined	culpeo
56854	2016-01-15	08:48:00	B	12.23	male	lamb	predation	undetermined	culpeo
56074	2016-01-16	08:42:00	B	10.74	female	lamb	predation	primary	culpeo
56865	2016-01-16	10:46:00	B	10.12	male	lamb	predation	primary	culpeo
56850	2016-01-23	17:30:00	A	26.7	male	lamb	undetermined
PCKS_01_30_04_16	2016-04-30	11:30:00	A	NA	female	adult	predation	primary	puma
PCKS_01_03_05_16	2016-05-03	12:20:00	A	NA	female	adult	predation	primary	puma
PCKS_01_04_05_16	2016-05-04	11:05:00	A	NA	female	adult	predation	primary	puma
PCKS_01_05_05_16	2016-05-05	11:10:00	A	NA	female	adult	predation	primary	puma
PCKS_01_26_06_16	2016-06-26	13:30:00	A	NA	female	adult	predation	primary	puma
PCKS_02_26_06_16	2016-06-26	13:00:00	A	NA	female	adult	predation	primary	puma
NN_01_29_06_16	2016-06-29	10:33:00	A	NA	female	adult	undetermined
NN_02_29_06_16	2016-06-29	10:20:00	A	NA	female	adult	undetermined
PCKS_01_30_06_16	2016-06-30	11:20:00	A	NA	female	adult	predation	primary	puma
PCKS_01_01_07_16	2016-07-01	10:20:00	A	NA	female	adult	predation	primary	puma
PCKS_02_01_07_16	2016-07-01	10:05:00	A	NA	female	adult	predation	primary	puma
PCKS_01_03_07_16	2016-07-03	13:00:00	A	NA	female	adult	predation	primary	puma
PCKS_02_03_07_16	2016-07-03	13:00:00	A	NA	female	adult	predation	primary	puma
PCKS_03_03_07_16	2016-07-03	13:00:00	A	NA	female	adult	predation	primary	puma
PCKS_04_03_07_16	2016-07-03	13:00:00	A	NA	female	adult	predation	primary	puma
PCKS_05_03_07_16	2016-07-03	13:00:00	A	NA	female	adult	predation	primary	puma
PCKS_01_28_07_16	2016-07-28	12:55:00	A	NA	female	adult	predation	secundary	puma
PCKS_01_29_07_16	2016-07-29	10:05:00	A	NA	female	adult	predation	primary	puma
PCKS_01_30_07_16	2016-07-30	13:23:00	A	NA	female	adult	predation	undetermined	puma
FDKS_01_24_08_16	2016-08-24	09:00:00	A	NA	female	adult	predation	secundary	feral_dog
LCKS_01_14_09_16	2016-09-14	11:05:00	A	NA	female	adult	predation	secundary	culpeo
FDKS_01_22_09_16	2016-09-22	08:45:00	B	NA	male	yearling	predation	secundary	feral_dog
FDKS_02_22_09_16	2016-09-22	12:45:00	B	NA	male	yearling	predation	secundary	feral_dog
FDKS_03_22_09_16	2016-09-22	12:45:00	B	NA	male	adult	predation	primary	feral_dog
FDKS_04_22_09_16	2016-09-22	14:55:00	B	NA	male	adult	predation	primary	feral_dog
FDKS_05_22_09_16	2016-09-22	14:55:00	B	NA	male	adult	predation	primary	feral_dog
OVI_01_24_09_16	2016-09-24	16:45:00	C	NA	female	adult	SHC
56828	2016-10-29	09:05:00	E	4.27	male	perinatal	SHC
56552	2016-10-29	10:50:00	E	4.02	male	perinatal	SHC
56581	2016-10-29	09:00:00	E	3.66	female	perinatal	SHC
56890	2016-11-01	08:30:00	E	4.1	female	perinatal	SHC
56857	2016-11-03	10:20:00	E	3.54	female	perinatal	cong_anorm
56554	2016-11-04	09:00:00	F	5.65	male	perinatal	dystocia
56895	2016-11-06	09:00:00	F	2.12	NA	perinatal	undetermined
NN_01_08_11_16	2016-11-08	09:40:00	F	NA	NA	perinatal	undetermined
56819	2016-11-10	15:50:00	F	4.52	male	perinatal	SHC
56825	2016-11-23	11:40:00	D	3.35	female	perinatal	predation	primary	feral_dog
FDKS_01_23_11_16	2016-11-24	12:00:00	D	NA	NA	lamb	predation	undetermined	feral_dog
NN_01_24_11_16	2016-11-24	10:00:00	A	NA	NA	perinatal	undetermined
FDKS_01_25_11_16	2016-11-25	11:10:00	A	NA	female	adult	predation	primary	feral_dog
FDKS_02_25_11_16	2016-11-25	11:10:00	A	NA	female	adult	predation	primary	feral_dog
FDKS_03_25_11_16	2016-11-26	12:10:00	A	6.11	male	perinatal	predation	primary	feral_dog
NN_01_28_11_16	2016-11-28	09:20:00	D	NA	male	perinatal	undetermined
PCKS_01_04_12_16	2016-12-04	08:45:00	B	NA	female	lamb	predation	primary	puma
LCKS_01_06_12_16	2016-12-06	08:30:00	B	7.01	female	lamb	predation	primary	culpeo
PCKS_01_07_12_16	2016-12-07	07:50:00	B	NA	female	adult	predation	primary	puma
PCKS_02_07_12_16	2016-12-08	07:50:00	B	11.67	female	lamb	predation	primary	puma
PCKS_03_07_12_16	2016-12-08	07:50:00	B	8.87	female	lamb	predation	primary	puma
PCKS_04_07_12_16	2016-12-08	11:50:00	B	NA	female	adult	predation	primary	puma
PCKS_05_07_12_16	2016-12-08	11:50:00	B	8.24	male	lamb	predation	primary	puma
PCKS_06_07_12_16	2016-12-08	17:00:00	B	9.54	male	lamb	predation	primary	puma
56543	2016-12-08	09:30:00	B	4.01	female	perinatal	predation	secundary	caracara
NN_01_26_12_16	2016-12-26	08:20:00	D	NA	NA	lamb	undetermined
NN_02_26_12_16	2016-12-26	09:40:00	D	NA	female	adult	predation	secundary	andean_condor
LCKS_01_29_12_16	2016-12-29	07:50:00	D	9.43	female	lamb	predation	primary	culpeo
FDKS_01_29_12_16	2016-12-29	10:55:00	A	NA	female	adult	predation	undetermined	feral_dog
LCKS_01_10_01_17	2017-01-10	18:00:00	F	22.72	male	lamb	predation	primary	culpeo
LCKS_02_10_01_17	2017-01-10	18:00:00	F	12.71	female	lamb	predation	undetermined	culpeo
NN_01_12_01_17	2017-01-12	09:30:00	F	19.7	female	lamb	undetermined
NN_01_07_02_17	2017-02-07	10:25:00	B	NA	NA	lamb	undetermined
LCKS_01_07_02_17	2017-02-07	11:15:00	B	17	male	lamb	predation	primary	culpeo
FDKS_01_13_02_17	2017-02-13	16:30:00	C	12.24	female	lamb	predation	undetermined	feral_dog
FDKS_02_13_02_17	2017-02-13	16:45:00	C	25.75	male	lamb	predation	primary	feral_dog
FDKS_03_13_02_17	2017-02-14	09:20:00	C	NA	female	lamb	predation	undetermined	feral_dog
FDKS_04_13_02_17	2017-02-14	09:30:00	C	NA	male	lamb	predation	undetermined	feral_dog
FDKS_05_13_02_17	2017-02-14	08:50:00	C	NA	female	adult	predation	primary	feral_dog
NN_01_02_03_17	2017-03-02	16:00:00	C	NA	male	lamb	undetermined
PCKS_01_04_03_17	2017-03-04	09:45:00	C	NA	female	adult	predation	undetermined	puma
OVI_01_04_03_17	2017-03-04	11:10:00	C	NA	female	adult	immersion
NN_01_05_03_17	2017-03-05	11:50:00	C	NA	male	yearling	undetermined
FDKS_01_07_03_17	2017-03-07	09:15:00	C	NA	male	yearling	predation	primary	feral_dog
FDKS_02_07_03_17	2017-03-07	09:15:00	C	NA	female	adult	predation	primary	feral_dog
LCKS_01_27_05_17	2017-05-24	11:50:00	B	NA	male	yearling	predation	undetermined	culpeo
PCKS_01_29_05_17	2017-05-29	15:00:00	B	NA	female	adult	predation	primary	puma
PCKS_02_29_05_17	2017-05-29	15:00:00	B	NA	female	adult	predation	primary	puma
PCKS_03_29_05_17	2017-05-29	15:00:00	B	NA	female	adult	predation	primary	puma
PCKS_04_29_05_17	2017-05-29	15:00:00	B	NA	female	adult	predation	primary	puma
LCKS_01_01_06_17	2017-06-01	09:50:00	B	NA	female	adult	predation	primary	culpeo
PCKS_01_21_06_17	2017-06-21	11:45:00	A	NA	female	adult	predation	primary	puma
FDKS_01_23_06_17	2017-06-23	11:45:00	A	NA	female	adult	predation	primary	feral_dog
OVI_01_08_07_17	2017-07-08	11:35:00	C	NA	female	adult	undetermined
OVI_02_08_07_17	2017-07-08	15:45:00	C	NA	female	adult	SHC
LCKS_01_08_07_17	2017-07-08	14:30:00	C	NA	female	yearling	predation	primary	culpeo
PCKS_01_18_08_17	2017-08-18	09:20:00	B	NA	female	adult	predation	primary	puma
PCKS_02_18_08_17	2017-08-18	09:20:00	B	NA	female	adult	predation	primary	puma
PCKS_03_18_08_17	2017-08-18	09:20:00	B	NA	female	adult	predation	primary	puma
PCKS_01_20_08_17	2017-08-20	09:50:00	B	NA	female	adult	predation	primary	puma
PCKS_02_20_08_17	2017-08-20	09:50:00	B	NA	female	adult	predation	primary	puma
PCKS_03_20_08_17	2017-08-20	09:50:00	B	NA	female	adult	predation	primary	puma
FDKS_01_06_09_17	2017-09-06	12:30:00	A	NA	male	yearling	predation	primary	feral_dog
FDKS_02_06_09_17	2017-09-06	12:30:00	A	NA	male	yearling	predation	secundary	feral_dog
FDKS_01_07_09_17	2017-09-07	10:15:00	A	NA	male	yearling	predation	secundary	feral_dog
FDKS_02_07_09_17	2017-09-07	10:15:00	A	NA	male	yearling	predation	primary	feral_dog
FDKS_03_07_09_17	2017-09-07	10:15:00	A	NA	male	yearling	predation	primary	feral_dog
FDKS_04_07_09_17	2017-09-07	10:15:00	A	NA	male	yearling	predation	secundary	feral_dog
FDKS_05_07_09_17	2017-09-07	10:15:00	A	NA	male	yearling	predation	secundary	feral_dog
FDKS_06_07_09_17	2017-09-07	10:15:00	A	NA	male	yearling	predation	secundary	feral_dog
FDKS_07_07_09_17	2017-09-07	10:15:00	A	NA	male	yearling	predation	primary	feral_dog
FDKS_08_07_09_17	2017-09-07	10:15:00	A	NA	male	yearling	predation	secundary	feral_dog
OVI_01_07_09_17	2017-09-07	10:15:00	A	NA	male	yearling	undetermined
OVI_02_07_09_17	2017-09-07	10:15:00	A	NA	male	yearling	undetermined
OVI_03_07_09_17	2017-09-07	10:15:00	A	NA	male	yearling	undetermined
OVI_04_07_09_17	2017-09-07	10:15:00	A	NA	male	yearling	undetermined
OVI_05_07_09_17	2017-09-07	10:15:00	A	NA	male	yearling	undetermined
OVI_01_08_09_17	2017-09-08	13:25:00	A	NA	male	yearling	undetermined
OVI_01_12_09_17	2017-09-12	10:46:00	A	NA	male	yearling	undetermined
OVI_02_12_09_17	2017-09-12	11:20:00	A	NA	male	yearling	SHC
LCKS_01_20_12_17	2017-12-20	07:15:00	B	NA	male	lamb	predation	undetermined	culpeo
LCKS_01_22_12_17	2017-12-22	07:15:00	B	11.3	female	lamb	predation	primary	culpeo
LCKS_02_22_12_17	2017-12-22	08:00:00	B	NA	female	lamb	predation	undetermined	culpeo
LCKS_01_05_01_18	2018-01-05	07:35:00	D	17.35	female	lamb	predation	primary	culpeo
OVI_01_05_01_18	2018-01-05	07:10:00	D	NA	male	lamb	undetermined
LCKS_01_07_01_18	2018-01-07	07:40:00	D	NA	female	lamb	predation	undetermined	culpeo
LCKS_01_26_01_18	2018-01-26	09:10:00	C	NA	female	lamb	predation	undetermined	culpeo
LCKS_02_26_01_18	2018-01-26	08:40:00	C	22.55	male	lamb	predation	primary	culpeo
LCKS_01_28_01_18	2018-01-28	08:30:00	C	20.88	male	lamb	predation	primary	culpeo
