# Supplementary material for: Pumas, culpeo foxes, bad and good dogs. Assessing strategies to mitigate predation
Source: Research Square preprint supplement (doi:10.21203/rs.3.rs-7234506/v1), 2025-09-03
Supplement: Supplementary file 3 [file 73763fa26c8d5d9ccf257bb9.xlsx]

## Sheet: Carcasas2016-2017_covs
id	longitude	latitude	ele	ranch	ranch_surface	date	event	hour	etarian_cat	diagnose	nearest_urbcent	dist_centurb	LGD	hpress_culpeo	hpress_puma	wh_biomass	puma_rai	culpeo_rai	ndvi	pumaks_tri	culpeoks_tri	lepus_rai
56828	-70.7892	-41.1011	1095	E	110.42	2016-10-29	1	09:05:00	perinatal	starv-hypoth	Pilcaniyeu	5523.86	1.81127	8.15	0	319.99	0	11.25	0.243377	5.66	3.61	5
56552	-70.7641	-41.1013	1008	E	110.42	2016-10-29	2	10:50:00	perinatal	starv-hypoth	Pilcaniyeu	3621.48	1.81127	8.15	0	319.99	0	11.25	0.243377	3.61	2	5
56581	-70.789	-41.1015	1099	E	110.42	2016-10-29	1	09:00:00	perinatal	starv-hypoth	Pilcaniyeu	5499.6	1.81127	8.15	0	319.99	0	11.25	0.243377	6.25	10.1	5
56890	-70.7851	-41.0991	1084	E	110.42	2016-11-01	3	08:30:00	perinatal	starv-hypoth	Pilcaniyeu	5291.19	1.81127	8.15	0	319.99	0	11.25	0.243377	13.86	15.49	5
56857	-70.7851	-41.0991	1077	E	110.42	2016-11-03	4	10:20:00	perinatal	malformation	Pilcaniyeu	5294.38	1.81127	8.15	0	319.99	0	11.25	0.243377	13.86	15.49	5
56554	-70.517	-41.2399	1053	F	51.8393	2016-11-04	5	09:00:00	perinatal	dystocia	Pilcaniyeu	20890.4	0	106.1	0	253.36	0	3.75	0.226846	8.77	8.66	2.5
56895	-70.5366	-41.277	1112	F	51.8393	2016-11-06	6	09:00:00	perinatal	undetermined	Pilcaniyeu	22509.3	0	106.1	0	253.36	0	2.5	0.226846	16.52	11.09	0
NN_01_08_11_16	-70.5492	-41.2541	1135	F	51.8393	2016-11-08	7	09:40:00	perinatal	undetermined	Pilcaniyeu	19925.3	0	106.1	0	253.36	0	3.75	0.226846	12.61	8.72	2.5
56819	-70.5358	-41.2801	1124	F	51.8393	2016-11-10	8	15:50:00	perinatal	starv-hypoth	Las bayas	22251.1	0	106.1	0	253.36	0	2.5	0.226846	5.29	5.66	0
56825	-71.0315	-41.0966	898	D	236.411	2016-11-23	9	11:40:00	perinatal	dog_pred	Nirihuau	8364.18	2.96095	14.8	2.11	807.99	0	8.75	0.30251	8.77	5.48	46.25
FDKS_01_23_11_16	-71.0282	-41.0898	882	D	236.411	2016-11-24	10	12:00:00	lamb	dog_pred	Nirihuau	8511.23	2.96095	14.8	2.11	807.99	0	8.75	0.30251	3.32	2.24	46.25
NN_01_24_11_16	-71.0029	-41.2159	1028	A	509.055	2016-11-24	11	10:00:00	perinatal	undetermined	Nirihuau	17621.3	0	34.38	0.59	852.44	0	5.13	0.310289	3.46	3.61	55
FDKS_01_25_11_16	-71.0799	-41.1264	838	A	509.055	2016-11-25	12	11:10:00	adults	dog_pred	Nirihuau	5881.16	0	34.38	0.59	852.44	0	7.5	0.310289	7.14	6.25	53.75
FDKS_02_25_11_16	-71.0797	-41.1264	834	A	509.055	2016-11-25	12	11:10:00	adults	dog_pred	Nirihuau	5892.37	0	34.38	0.59	852.44	0	7.5	0.310289	7.14	5.1	53.75
FDKS_03_25_11_16	-71.0826	-41.1258	836	A	509.055	2016-11-26	12	12:10:00	perinatal	dog_pred	Nirihuau	5664.12	0	34.38	0.59	852.44	0	7.5	0.310289	9.43	6.93	53.75
NN_01_28_11_16	-71.0183	-41.1362	996	D	236.411	2016-11-28	13	09:20:00	perinatal	undetermined	Nirihuau	10753.1	2.96095	14.8	2.11	807.99	0	32.5	0.30251	4.8	6.78	71.25
PCKS_01_04_12_16	-70.8172	-41.4412	1078	B	280.157	2016-12-04	14	08:45:00	lamb	puma_pred	Las bayas	12156	0	13.21	0.71	182.24	5	0	0.23046	4.36	3.46	0
LCKS_01_06_12_16	-70.7233	-41.4314	1012	B	280.157	2016-12-06	15	08:30:00	lamb	culpeo_pred	Las bayas	5005.04	0	13.21	0.71	182.24	21.25	0	0.23046	6.08	8.12	0
PCKS_01_07_12_16	-70.7334	-41.4254	1051	B	280.157	2016-12-07	16	07:50:00	adults	puma_pred	Las bayas	6071.21	0	13.21	0.71	182.24	21.25	0	0.23046	3.32	3.46	0
PCKS_02_07_12_16	-70.734	-41.4249	1044	B	280.157	2016-12-08	16	07:50:00	lamb	puma_pred	Las bayas	6140.44	0	13.21	0.71	182.24	21.25	0	0.23046	5.2	5.74	0
PCKS_03_07_12_16	-70.734	-41.4248	1044	B	280.157	2016-12-08	16	07:50:00	lamb	puma_pred	Las bayas	6144.48	0	13.21	0.71	182.24	21.25	0	0.23046	4.36	5.74	0
PCKS_04_07_12_16	-70.7341	-41.4256	1049	B	280.157	2016-12-08	16	11:50:00	adults	puma_pred	Las bayas	6112.33	0	13.21	0.71	182.24	21.25	0	0.23046	3.32	2.45	0
PCKS_05_07_12_16	-70.7266	-41.4276	1002	B	280.157	2016-12-08	16	11:50:00	lamb	puma_pred	Las bayas	5550.65	0	13.21	0.71	182.24	21.25	0	0.23046	3.87	4.47	0
PCKS_06_07_12_16	-70.7268	-41.427	1006	B	280.157	2016-12-08	16	17:00:00	lamb	puma_pred	Las bayas	5528.05	0	13.21	0.71	182.24	21.25	0	0.23046	5.2	8.43	0
NN_01_26_12_16	-71.0312	-41.1314	985	D	236.411	2016-12-26	17	08:20:00	lamb	undetermined	Nirihuau	9542.13	2.96095	14.8	2.11	807.99	0	32.5	0.30251	14.07	14.93	71.25
LCKS_01_29_12_16	-71.015	-41.14	918	D	236.411	2016-12-29	18	07:50:00	lamb	culpeo_pred	Nirihuau	11196.3	2.96095	14.8	2.11	807.99	0	32.5	0.30251	5.74	7.28	71.25
FDKS_01_29_12_16	-71.0714	-41.1325	879	A	509.055	2016-12-29	19	10:55:00	adults	dog_pred	Nirihuau	6864.65	0	34.38	0.59	852.44	0	7.5	0.310289	6.08	7.35	53.75
LCKS_01_10_01_17	-70.5494	-41.2529	1040	F	51.8393	2017-01-10	20	18:00:00	lamb	culpeo_pred	Pilcaniyeu	19815.3	0	106.1	0	253.36	0	3.75	0.226846	10.44	6.16	2.5
LCKS_02_10_01_17	-70.5452	-41.2574	1130	F	51.8393	2017-01-10	20	18:00:00	lamb	culpeo_pred	Pilcaniyeu	20422.6	0	106.1	0	253.36	0	3.75	0.226846	3.61	3.61	2.5
NN_01_12_01_17	-70.5186	-41.2332	997	F	51.8393	2017-01-12	21	09:30:00	lamb	undetermined	Pilcaniyeu	20333.3	0	106.1	0	253.36	0	3.75	0.226846	2.83	3.16	2.5
NN_01_07_02_17	-70.7392	-41.4224	1019	B	280.157	2017-02-07	22	10:25:00	lamb	undetermined	Las bayas	6661.14	0	13.21	0.71	182.24	21.25	0	0.23046	1.41	1.73	0
LCKS_01_07_02_17	-70.7716	-41.3992	1037	B	280.157	2017-02-07	23	11:15:00	lamb	culpeo_pred	Las bayas	10349.7	0	13.21	0.71	182.24	0	8.75	0.23046	3.74	3.61	22.5
FDKS_01_13_02_17	-70.6769	-41.1209	999	C	396.1	2017-02-13	24	16:30:00	lamb	dog_pred	Pilcaniyeu	3137.4	1.00985	9.85	0.76	359.65	0	9.3	0.240028	4	4.69	4.65
FDKS_02_13_02_17	-70.6782	-41.1199	995	C	396.1	2017-02-13	24	16:45:00	lamb	dog_pred	Pilcaniyeu	3038.05	1.00985	9.85	0.76	359.65	0	9.3	0.240028	4.36	4.12	4.65
FDKS_03_13_02_17	-70.6788	-41.1183	991	C	396.1	2017-02-14	24	09:20:00	lamb	dog_pred	Pilcaniyeu	2997.1	1.00985	9.85	0.76	359.65	0	9.3	0.240028	8.25	6.71	4.65
FDKS_04_13_02_17	-70.6755	-41.1166	990	C	396.1	2017-02-14	24	09:30:00	lamb	dog_pred	Pilcaniyeu	3287.43	1.00985	9.85	0.76	359.65	0	9.3	0.240028	8.83	5.39	4.65
FDKS_05_13_02_17	-70.6786	-41.1187	995	C	396.1	2017-02-14	24	08:50:00	adults	dog_pred	Pilcaniyeu	3015.92	1.00985	9.85	0.76	359.65	0	9.3	0.240028	4.69	4.9	4.65
NN_01_02_03_17	-70.6667	-41.1785	982	C	396.1	2017-03-02	25	16:00:00	yearling	undetermined	Pilcaniyeu	7150.54	1.00985	9.85	0.76	359.65	0	2.5	0.240028	6.86	6.08	3.75
PCKS_01_04_03_17	-70.7066	-41.2276	1041	C	396.1	2017-03-04	26	09:45:00	adults	puma_pred	Pilcaniyeu	11413.9	1.00985	9.85	0.76	359.65	0	0	0.240028	4.24	5.66	0
OVI_01_04_03_17	-70.7057	-41.2158	1025	C	396.1	2017-03-04	27	11:10:00	adults	immersion	Pilcaniyeu	10114.4	1.00985	9.85	0.76	359.65	0	0	0.240028	2.83	2.83	0
NN_01_05_03_17	-70.673	-41.1736	987	C	396.1	2017-03-05	28	11:50:00	yearling	undetermined	Pilcaniyeu	6407.31	1.00985	9.85	0.76	359.65	2.5	2.5	0.240028	4.47	3.61	3.75
FDKS_01_07_03_17	-70.6819	-41.1466	978	C	396.1	2017-03-07	29	09:15:00	yearling	dog_pred	Pilcaniyeu	3618.37	1.00985	9.85	0.76	359.65	0	9.3	0.240028	2.65	2.24	0
FDKS_02_07_03_17	-70.6813	-41.1461	978	C	396.1	2017-03-07	29	09:15:00	adults	dog_pred	Pilcaniyeu	3610.7	1.00985	9.85	0.76	359.65	0	9.3	0.240028	1.73	2.83	0
LCKS_01_27_05_17	-70.8193	-41.4385	1045	B	280.157	2017-05-24	29	11:50:00	yearling	culpeo_pred	Las bayas	12377.6	0	13.21	0.71	182.24	5	0	0.23046	4.24	2.45	0
PCKS_01_29_05_17	-70.8132	-41.4506	1027	B	280.157	2017-05-29	30	15:00:00	adults	puma_pred	Las bayas	11723.3	0	13.21	0.71	182.24	5	0	0.23046	4.12	4.8	0
PCKS_02_29_05_17	-70.826	-41.4546	1031	B	280.157	2017-05-29	30	15:00:00	adults	puma_pred	Las bayas	12777.7	0	13.21	0.71	182.24	3.77	0	0.23046	8.83	3.61	0
PCKS_03_29_05_17	-70.8173	-41.4522	1029	B	280.157	2017-05-29	30	15:00:00	adults	puma_pred	Las bayas	12059.2	0	13.21	0.71	182.24	5	0	0.23046	5.2	2	0
PCKS_04_29_05_17	-70.814	-41.4501	1029	B	280.157	2017-05-29	30	15:00:00	adults	puma_pred	Las bayas	11789.5	0	13.21	0.71	182.24	5	0	0.23046	6.78	5.66	0
LCKS_01_01_06_17	-70.8349	-41.3738	1089	B	280.157	2017-06-01	31	09:50:00	adults	culpeo_pred	Las bayas	16309	0	13.21	0.71	182.24	0	8.75	0.23046	3.74	5.48	22.5
PCKS_01_21_06_17	-71.0911	-41.2163	931	A	509.055	2017-06-21	32	11:45:00	adults	puma_pred	Nirihuau	14026.2	0	34.38	0.59	852.44	1.25	1.25	0.310289	11.92	15.23	52.5
FDKS_01_23_06_17	-71.101	-41.2181	1044	A	509.055	2017-06-23	33	11:45:00	adults	dog_pred	Nirihuau	13913.9	0	34.38	0.59	852.44	1.25	1.25	0.310289	11.27	14.9	52.5
OVI_01_08_07_17	-70.6578	-41.212	1007	C	396.1	2017-07-08	34	11:35:00	adults	undetermined	Pilcaniyeu	10756.5	1.00985	9.85	0.76	359.65	2.5	2.5	0.240028	3.61	2.45	3.75
OVI_02_08_07_17	-70.6114	-41.1139	1106	C	396.1	2017-07-08	35	15:45:00	adults	starv-hypoth	Pilcaniyeu	8684.67	1.00985	9.85	0.76	359.65	0	27.5	0.240028	25.2	14.39	0
LCKS_01_08_07_17	-70.6468	-41.1062	1017	C	396.1	2017-07-08	36	14:30:00	yearling	culpeo_pred	Pilcaniyeu	5837.23	1.00985	9.85	0.76	359.65	0	27.5	0.240028	10	7.07	0
PCKS_01_18_08_17	-70.758	-41.441	1050	B	280.157	2017-08-18	37	09:20:00	adults	puma_pred	Las bayas	7292.52	0	13.21	0.71	182.24	21.25	0	0.23046	8.94	6.93	0
PCKS_02_18_08_17	-70.7584	-41.4413	1051	B	280.157	2017-08-18	37	09:20:00	adults	puma_pred	Las bayas	7313.13	0	13.21	0.71	182.24	21.25	0	0.23046	10.91	7.68	0
PCKS_03_18_08_17	-70.7583	-41.4415	1056	B	280.157	2017-08-18	37	09:20:00	adults	puma_pred	Las bayas	7305.41	0	13.21	0.71	182.24	21.25	0	0.23046	13.96	12.08	0
PCKS_01_20_08_17	-70.7577	-41.4435	1090	B	280.157	2017-08-20	38	09:50:00	adults	puma_pred	Las bayas	7207.11	0	13.21	0.71	182.24	21.25	0	0.23046	14.35	9.7	0
PCKS_02_20_08_17	-70.757	-41.4427	1107	B	280.157	2017-08-20	38	09:50:00	adults	puma_pred	Las bayas	7162.33	0	13.21	0.71	182.24	21.25	0	0.23046	14.53	9.95	0
PCKS_03_20_08_17	-70.7565	-41.4431	1108	B	280.157	2017-08-20	38	09:50:00	adults	puma_pred	Las bayas	7117.35	0	13.21	0.71	182.24	21.25	0	0.23046	8.83	7.62	0
FDKS_01_06_09_17	-71.0589	-41.1604	869	A	509.055	2017-09-06	39	12:30:00	yearling	dog_pred	Nirihuau	9876.19	0	34.38	0.59	852.44	0	17.5	0.310289	2.45	2.45	75
FDKS_02_06_09_17	-71.0548	-41.1518	862	A	509.055	2017-09-06	39	12:30:00	yearling	dog_pred	Nirihuau	9365.94	0	34.38	0.59	852.44	0	17.5	0.310289	6.63	6.08	75
FDKS_01_07_09_17	-71.0606	-41.1615	860	A	509.055	2017-09-07	40	10:15:00	yearling	dog_pred	Nirihuau	9876.27	0	34.38	0.59	852.44	0	17.5	0.310289	4.8	2.83	75
FDKS_02_07_09_17	-71.0612	-41.1613	859	A	509.055	2017-09-07	40	10:15:00	yearling	dog_pred	Nirihuau	9838.75	0	34.38	0.59	852.44	0	17.5	0.310289	4.36	4.36	75
FDKS_03_07_09_17	-71.0611	-41.1625	866	A	509.055	2017-09-07	40	10:15:00	yearling	dog_pred	Nirihuau	9947.71	0	34.38	0.59	852.44	0	17.5	0.310289	6.48	10.91	75
FDKS_04_07_09_17	-71.0673	-41.165	878	A	509.055	2017-09-07	40	10:15:00	yearling	dog_pred	Nirihuau	9884.5	0	34.38	0.59	852.44	0	17.5	0.310289	22.38	17.92	75
FDKS_05_07_09_17	-71.0593	-41.1789	956	A	509.055	2017-09-07	40	10:15:00	yearling	dog_pred	Nirihuau	11528.3	0	34.38	0.59	852.44	0	17.5	0.310289	17.49	15.3	75
FDKS_06_07_09_17	-71.0675	-41.1578	840	A	509.055	2017-09-07	40	10:15:00	yearling	dog_pred	Nirihuau	9211.53	0	34.38	0.59	852.44	0	17.5	0.310289	3.46	2	75
FDKS_07_07_09_17	-71.0685	-41.1594	826	A	509.055	2017-09-07	40	10:15:00	yearling	dog_pred	Nirihuau	9313.39	0	34.38	0.59	852.44	0	17.5	0.310289	3.46	2.24	75
FDKS_08_07_09_17	-71.0664	-41.1571	853	A	509.055	2017-09-07	40	10:15:00	yearling	dog_pred	Nirihuau	9199.48	0	34.38	0.59	852.44	0	17.5	0.310289	4	3	75
OVI_01_07_09_17	-71.0698	-41.163	842	A	509.055	2017-09-07	41	10:15:00	yearling	undetermined	Nirihuau	9588.16	0	34.38	0.59	852.44	0	17.5	0.310289	4.47	4.9	75
OVI_02_07_09_17	-71.0666	-41.1653	892	A	509.055	2017-09-07	41	10:15:00	yearling	undetermined	Nirihuau	9944.21	0	34.38	0.59	852.44	0	17.5	0.310289	5.2	6.08	75
OVI_03_07_09_17	-71.073	-41.1694	842	A	509.055	2017-09-07	41	10:15:00	yearling	undetermined	Nirihuau	10000.1	0	34.38	0.59	852.44	0	17.5	0.310289	6	6	75
OVI_04_07_09_17	-71.0582	-41.1794	991	A	509.055	2017-09-07	41	10:15:00	yearling	undetermined	Nirihuau	11627.2	0	34.38	0.59	852.44	0	17.5	0.310289	29.97	31.45	75
OVI_05_07_09_17	-71.068	-41.1581	839	A	509.055	2017-09-07	41	10:15:00	yearling	undetermined	Nirihuau	9207.59	0	34.38	0.59	852.44	0	17.5	0.310289	2	2	75
OVI_01_08_09_17	-71.068	-41.1803	900	A	509.055	2017-09-08	42	13:25:00	yearling	undetermined	Nirihuau	11238.8	0	34.38	0.59	852.44	0	17.5	0.310289	8.12	7.81	75
OVI_02_08_09_17	-71.0075	-41.2245	875	A	509.055	2017-09-08	42	18:30:00	yearling	undetermined	Nirihuau	18169.2	0	34.38	0.59	852.44	0	5.13	0.310289	2.83	8.89	100
OVI_01_12_09_17	-71.0628	-41.1642	822	A	509.055	2017-09-12	43	10:46:00	yearling	undetermined	Nirihuau	10018	0	34.38	0.59	852.44	0	17.5	0.310289	2.45	8.66	75
OVI_02_12_09_17	-71.0709	-41.1672	812	A	509.055	2017-09-12	43	11:20:00	yearling	starv-hypoth	Nirihuau	9898.77	0	34.38	0.59	852.44	0	17.5	0.310289	10.25	8.19	75
