# Supplementary material for: Pumas, culpeo foxes, bad and good dogs. Assessing strategies to mitigate predation
Source: Research Square preprint supplement (doi:10.21203/rs.3.rs-7234506/v1), 2025-09-03
Supplement: Supplementary file 4 [file aad220146e39d69c6bb212a0.docx]

**Supporting Information-A4**

**Table 1:** Ranking of wAIC Models based on their performance in explain the probability of death occurrence for each modelled sheep mortality factor. The table also presents the difference in Bayesian Expected Logarithmic Predictive Density (Δ ELPD) for all models relative to the top-ranked model.

| Model | wAIC | ELPD difference |
| --- | --- | --- |
| *diag ~ LGD + hpress_puma + (1 | event) + (1 | ranch)* | 58,5 | 0,0 |
| *diag~culpeo_rai + wh_biomass + (1 | event) + (1 | ranch)* | 61,8 | -1,7 |
| *diag ~ hpress_culpeo + hpress_puma + (1 | event) + (1 | ranch)* | 62,6 | -2,0 |
| *diag~puma_rai + wh_biomass + (1 | event) + (1 | ranch)* | 63,0 | -2,2 |
| *diag ~ dist_centurb + LGD + (1 | event) + (1 | ranch)* | 63,3 | -2,4 |
| *diag~puma_rai + ndvi + (1 | event) + (1 | ranch)* | 63,5 | -2,5 |
| *diag~puma_rai + dist_centurb + (1 | event) + (1 | ranch)* | 63,5 | -2,5 |
| *diag~culpeo_rai + ndvi + (1 | event) + (1 | ranch)* | 63,6 | -2,5 |
| *diag ~ LGD + hpress_culpeo + (1 | event) + (1 | ranch)* | 64,0 | -2,7 |
| *diag ~ culpeo_rai + LGD + (1 | event) + (1 | ranch)* | 64,1 | -2,8 |
| *diag ~ puma_rai + LGD + (1 | event) + (1 | ranch)* | 64,1 | -2,8 |
| *diag~puma_rai + pumaks_tri + (1 | event) + (1 | ranch)* | 64,8 | -3,1 |
| *diag~puma_rai + ele + (1 | event) + (1 | ranch)* | 64,8 | -3,2 |
| *diag~dist_centurb + wh_biomass + (1 | event) + (1 | ranch)* | 64,9 | -3,2 |
| *diag ~ ndvi + hpress_culpeo + (1 | event) + (1 | ranch)* | 65,1 | -3,3 |
| *diag ~ puma_rai + hpress_puma + (1 | event) + (1 | ranch)* | 65,3 | -3,4 |
| *diag ~ culpeo_rai + hpress_culpeo + (1 | event) + (1 | ranch)* | 65,5 | -3,5 |
| *diag~culpeo_rai + ele + (1 | event) + (1 | ranch)* | 65,8 | -3,6 |
| *diag~culpeo_rai + dist_centurb + (1 | event) + (1 | ranch)* | 65,9 | -3,7 |
| *diag~puma_rai + lepus_rai + (1 | event) + (1 | ranch)* | 66,0 | -3,8 |
| *diag~dist_centurb + ndvi + (1 | event) + (1 | ranch)* | 66,0 | -3,8 |
| *diag ~ ndvi + hpress_puma + (1 | event) + (1 | ranch)* | 66,2 | -3,8 |
| *diag~culpeo_rai + culpeoks_tri + (1 | event) + (1 | ranch)* | 66,2 | -3,9 |
| *diag ~ ndvi + LGD + (1 | event) + (1 | ranch)* | 66,8 | -4,2 |
| *diag~puma_rai + culpeo_rai + (1 | event) + (1 | ranch)* | 67,0 | -4,3 |
| *diag~culpeo_rai + lepus_rai + (1 | event) + (1 | ranch)* | 67,1 | -4,3 |
| *diag~puma_rai + (1 | event) + (1 | ranch)* | 73,4 | -7,4 |
| *diag~culpeo_rai + (1 | event) + (1 | ranch)* | 73,5 | -7,5 |
| *diag ~ LGD + (1 | event) + (1 | ranch)* | 75,0 | -8,2 |
| *diag ~ hpress_puma + (1 | event) + (1 | ranch)* | 75,1 | -8,3 |
| *diag~dist_centurb + (1 | event) + (1 | ranch)* | 75,1 | -8,3 |
| *diag ~ ndvi + (1 | event) + (1 | ranch)* | 75,5 | -8,5 |
| *diag ~ hpress_culpeo + (1 | event) + (1 | ranch)* | 75,8 | -8,6 |
